# Supplementary material for: Ethanol sensor development based on ternary-doped metal oxides (CdO/ZnO/Yb2O3) nanosheets for environmental safety
Source: Royal Society of Chemistry journal article supplement (doi:10.1039/c7ra01852e), 2017-01-01
Supplement: c7ra01852e1.pdf [file c7ra01852e1.pdf]

Electronic Supplemental Materials (ESM)

(Ψ) Selectivity of ethanol sensor based on CdO/ZnO/Yb<sub>2</sub>O<sub>3</sub> NSs

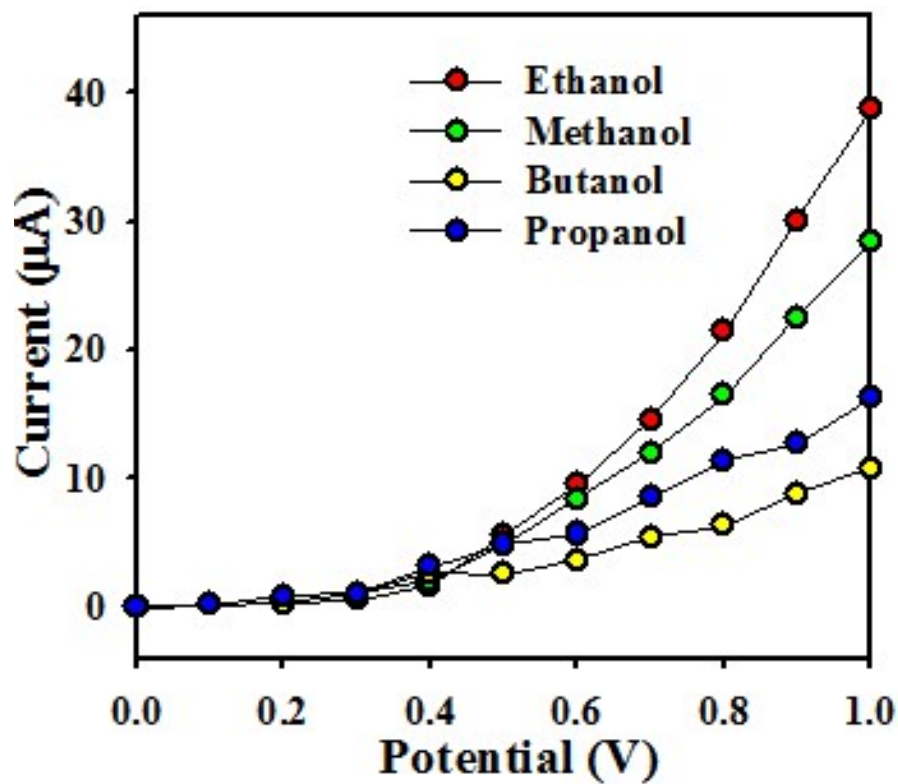

Fig. S1.

( $\Omega$ ) Optimization of ethanol sensor based on CdO/ZnO/Yb<sub>2</sub>O<sub>3</sub> NSs in **intra-day**, such as (a) Repeatability at 0 hour, (b) Repeatability after 1 hour, (c) Repeatability after 2 hours, (d) Repeatability after 3 hours, and (e) Repeatability after 4 hours.

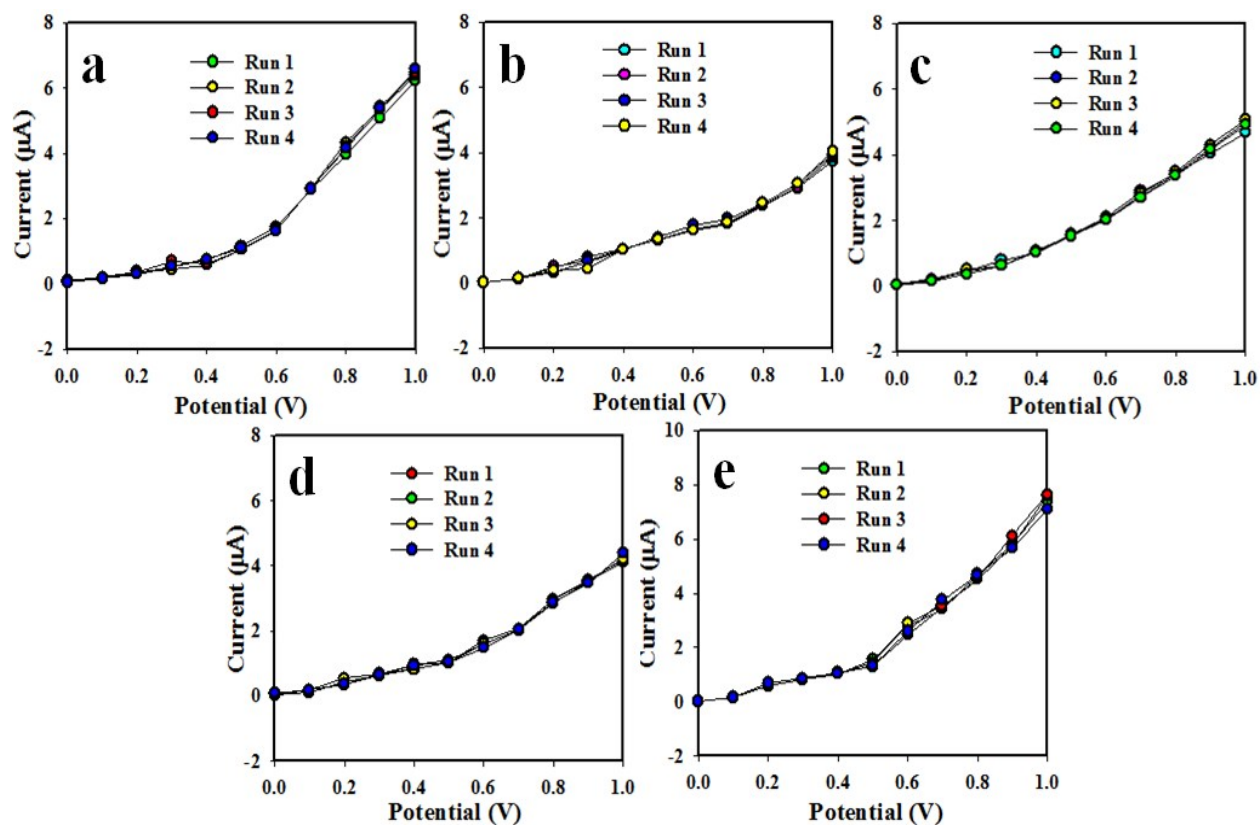

Fig. S2.

(η) Optimization of ethanol sensor based on CdO/ZnO/Yb<sub>2</sub>O<sub>3</sub> NSs in **inter-day**, such as, (a) repeatability at beginning day, (b) repeatability after 1 day, (c) repeatability after 2 days, (d) repeatability after 3 days and (e) repeatability after 4 days.

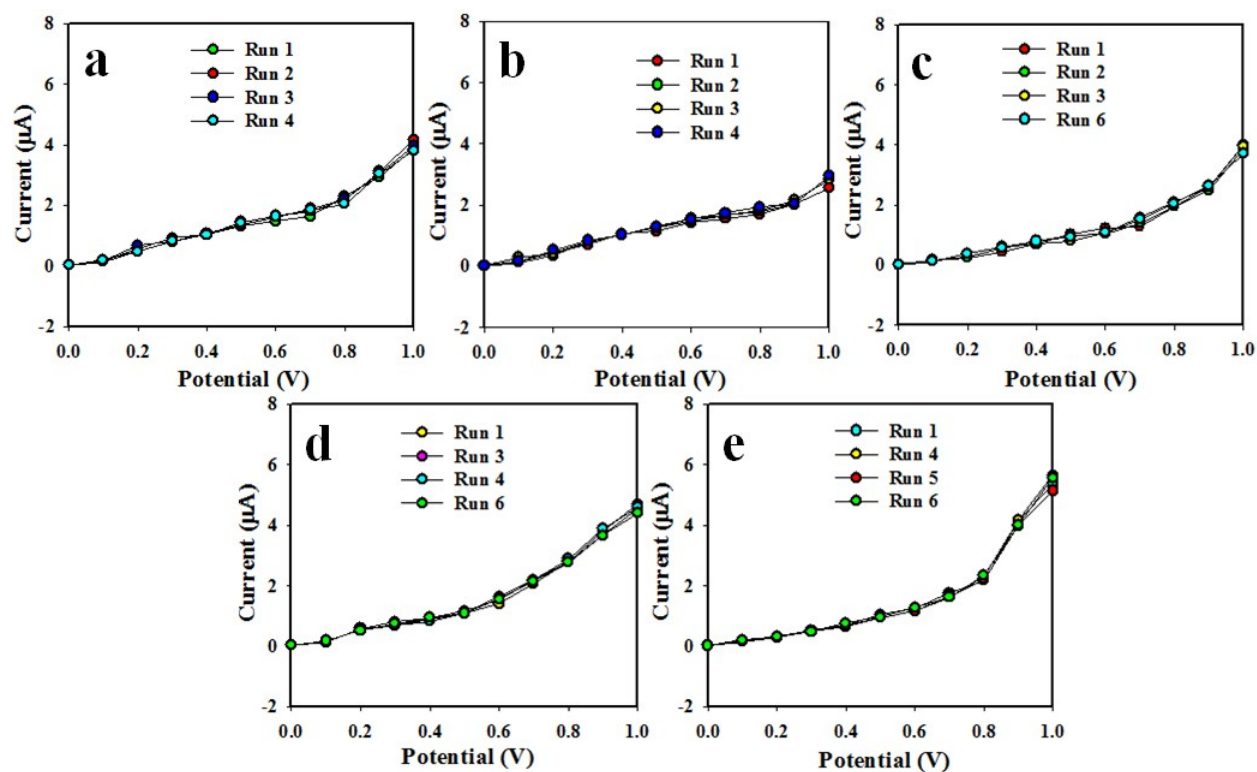

Fig. S3.
